# Supplementary material for: Metagenomics-based analysis of microbial community dynamics and flavor compound correlations during rice-flavor Baijiu brewing
Source: Front Bioeng Biotechnol. 2025 Aug 5;13:1638716. doi: 10.3389/fbioe.2025.1638716 (PMC12362989; doi:10.3389/fbioe.2025.1638716)
Supplement: Supplementary file 1 [file Table1.xlsx]

## Sheet: Table S1
Table S1. Microorganisms associated with glycoside hydrolases (GHs) and glycosyltransferases (GTs) during different brewing stages in RFB (RC>1%).
CAZy at level 2	Samples	Microorganisms (genus)
GH1	JQ	Rhizopus, Weissella, Pediococcus, Unclassified_d_Bacteria, Unclassified_o_Lactobacillales, Enterococcus, Latilactobacillus
	THJS	Rhizopus, Limosilactobacillus, Klebsiella, Pediococcus, Unclassified_d_Bacteria, Weissella, Lactobacillus, Lactococcus, Enterococcus, Unclassified_f_Lactobacillaceae,Enterobacter,Unclassified_f_Enterobacteriaceae,Leuconostoc,Gluconobacter
	FJ3D	Rhizopus,Limosilactobacillus,Lactobacillus,Unclassified_d_Bacteria,Pediococcus,Klebsiella,Weissella,Enterococcus,Lactococcus,Unclassified_f_Lactobacillaceae,Exiguobacterium,Leuconostoc,Enterobacter,Unclassified_f_Enterobacteriaceae,Schleiferilactobacillus
	FJ9D	Rhizopus,Lactobacillus,Weissella,Limosilactobacillus,Pediococcus,Unclassified_d_Bacteria,Klebsiella,Unclassified_f_Lactobacillaceae, Leuconostoc,Lactococcus,Enterococcus
GH2	JQ	Weissella,Unclassified_f_Lactobacillaceae,Pediococcus,Unclassified_o_Lactobacillales,Saccharomyces,Enterococcus
	THJS	Unclassified_f_Lactobacillaceae,Klebsiella,Pediococcus,Limosilactobacillus,Lactococcus,Weissella,Enterobacter,Enterococcus,Saccharomyces,Unclassified_f_Enterobacteriaceae,Leuconostoc,Exiguobacterium,Cyberlindnera,Unclassified_o_Lactobacillales,Streptococcus
	FJ3D	Unclassified_f_Lactobacillaceae,Pediococcus,Limosilactobacillus,Klebsiella,Weissella,Saccharomyces,Lactococcus,Exiguobacterium,Enterococcus,Enterobacter,Leuconostoc,Unclassified_f_Enterobacteriaceae
	FJ9D	Unclassified_f_Lactobacillaceae,Klebsiella,Pediococcus,Limosilactobacillus,Weissella,Lactococcus,Enterococcus,Exiguobacterium,Enterobacter,Leuconostoc,Saccharomyces,Unclassified_f_Enterobacteriaceae,Unclassified_o_Saccharomycetales
GH4	JQ	Pediococcus,Unclassified_f_Lactobacillaceae,Enterococcus,Limosilactobacillus,Latilactobacillus,Acetobacter,Unclassified_o_Saccharomycetales,Weissella
	THJS	Lactobacillus,Limosilactobacillus,Klebsiella,Gluconobacter
	FJ3D	Lactobacillus,Limosilactobacillus
	FJ9D	Lactobacillus,Limosilactobacillus
GH13	JQ	Weissella,Pediococcus,Unclassified_o_Lactobacillales,Enterococcus,Unclassified_o_Rhodospirillales,Lactococcus,Unclassified_f_Acetobacteraceae
	THJS	Klebsiella,Pediococcus,Lactococcus,Weissella,Enterococcus,Exiguobacterium,Enterobacter,Unclassified_f_Enterobacteriaceae,Unclassified_f_Lactobacillaceae,Unclassified_d_Bacteria,Gluconobacter,Limosilactobacillus,Leuconostoc,Unclassified_o_Lactobacillales,Unclassified_o_Enterobacterales,Streptococcus,Unclassified_o_Rhodospirillales,Cyberlindnera,Unclassified_p_Firmicutes,Moraxella,Unclassified_f_St…
	FJ3D	Exiguobacterium,Pediococcus,Weissella,Klebsiella,Enterococcus,Lactococcus,Leuconostoc,Enterobacter,Limosilactobacillus,Unclassified_d_Bacteria,Unclassified_f_Lactobacillaceae,Unclassified_o_Lactobacillales,Unclassified_f_Enterobacteriaceae,Lactobacillus,Unclassified_p_Firmicutes,Streptococcus,Gluconobacter,Unclassified_o_Enterobacterales,Moraxella
	FJ9D	Exiguobacterium,Pediococcus,Weissella,Klebsiella,Leuconostoc,Enterococcus,Lactococcus,Unclassified_f_Enterobacteriaceae,Enterobacter,Limosilactobacillus,Unclassified_f_Lactobacillaceae,Lactobacillus,Unclassified_d_Bacteria,Unclassified_o_Lactobacillales,Unclassified_o_Enterobacterales,Streptococcus,Gluconobacter
GH25	JQ	Weissella,Pediococcus,Unclassified_f_Acetobacteraceae,Enterococcus,Unclassified_f_Lactobacillaceae,Leuconostoc
	THJS	Pediococcus,Weissella,Lactococcus,Limosilactobacillus,Enterococcus,Leuconostoc,Streptococcus,Unclassified_f_Acetobacteraceae,Lactobacillus,Gluconobacter,Unclassified_f_Enterobacteriaceae,Klebsiella,Unclassified_f_Lactobacillaceae,Exiguobacterium,Acinetobacter,Enterobacter,Acetobacter
	FJ3D	Weissella,Pediococcus,Lactobacillus,Lactococcus,Leuconostoc,Limosilactobacillus,Enterococcus,Exiguobacterium,Streptococcus,Unclassified_f_Acetobacteraceae,Unclassified_f_Enterobacteriaceae,Unclassified_f_Lactobacillaceae,Klebsiella,Unclassified_o_Saccharomycetales,Gluconobacter
	FJ9D	Weissella,Pediococcus,Lactococcus,Lactobacillus,Leuconostoc,Limosilactobacillus,Enterococcus,Exiguobacterium,Streptococcus,Unclassified_f_Acetobacteraceae,Gluconobacter,Unclassified_f_Lactobacillaceae,Klebsiella,Unclassified_f_Enterobacteriaceae
GH28	JQ	Ogataea,Unclassified_f_Lactobacillaceae
	THJS	Ogataea,Pediococcus,Unclassified_f_Lactobacillaceae,Unclassified_d_Bacteria,Cyberlindnera,Unclassified_c_Gammaproteobacteria,Unclassified_o_Lactobacillales,Klebsiella,Unclassified_p_Proteobacteria,Unclassified_o_Enterobacterales,Acinetobacter,Unclassified_f_Streptococcaceae
	FJ3D	Ogataea,Unclassified_f_Lactobacillaceae,Pediococcus,Aeromonas,Unclassified_d_Bacteria,Dechloromonas,Exiguobacterium,Unclassified_o_Lactobacillales,Weissella,Cyberlindnera,Klebsiella,Unclassified_p_Proteobacteria,Unclassified_o_Enterobacterales,Lactobacillus
	FJ9D	Ogataea,Aeromonas,Pediococcus,Unclassified_f_Lactobacillaceae,Dechloromonas,Unclassified_d_Bacteria,Lactobacillus,Weissella,Exiguobacterium,Cyberlindnera
GH32	JQ	Weissella,Pediococcus,Saccharomyces,Enterococcus,Unclassified_f_Lactobacillaceae,Leuconostoc,Unclassified_o_Lactobacillales,Unclassified_d_Bacteria,Ascoidea
	THJS	Klebsiella,Lentilactobacillus,Pediococcus,Weissella,Limosilactobacillus,Cyberlindnera,Unclassified_o_Lactobacillales,Saccharomyces,Unclassified_d_Bacteria,Unclassified_f_Lactobacillaceae,Enterobacter,Unclassified_f_Enterobacteriaceae,Leuconostoc,Enterococcus,Streptococcus,Lactococcus,Gluconobacter, Exiguobacterium,Rhizopus,Unclassified_f_Streptococcaceae
	FJ3D	Lentilactobacillus,Weissella,Limosilactobacillus,Unclassified_d_Bacteria,Saccharomyces,Pediococcus,Klebsiella,Leuconostoc,Exiguobacterium,Lactobacillus,Unclassified_f_Enterobacteriaceae,Unclassified_f_Lactobacillaceae,Unclassified_o_Lactobacillales,Enterobacter,Enterococcus ,Cyberlindnera,Lactococcus,Streptococcus
	FJ9D	Lentilactobacillus,Weissella,Unclassified_d_Bacteria,Klebsiella,Pediococcus,Limosilactobacillus,Lactobacillus,Saccharomyces,Enterobacter,Exiguobacterium,Unclassified_f_Enterobacteriaceae,Rhizopus,Leuconostoc,Unclassified_f_Lactobacillaceae,Unclassified_o_Lactobacillales,Enterococcus,Lactococcus
GT4	JQ	Weissella,Pediococcus,Unclassified_o_Lactobacillales,Unclassified_f_Lactobacillaceae,Unclassified_c_Bacilli,Enterococcus,Acetobacter,Lactobacillus,Unclassified_d_Bacteria,Unclassified_o_Saccharomycetales,Latilactobacillus,Gluconobacter,Lactococcus
	THJS	Lactobacillus,Unclassified_f_Lactobacillaceae,Pediococcus,Gluconobacter,Klebsiella,Weissella,Limosilactobacillus,Unclassified_d_Bacteria,Unclassified_o_Lactobacillales,Lactococcus,Enterococcus,Enterobacter,Cyberlindnera,Unclassified_f_Enterobacteriaceae,Exiguobacterium,Leuconostoc,Unclassified_c_Bacilli
	FJ3D	Lactobacillus,Unclassified_f_Lactobacillaceae,Pediococcus,Unclassified_d_Bacteria,Weissella,Limosilactobacillus,Exiguobacterium,Klebsiella,Unclassified_o_Lactobacillales,Leuconostoc,Enterococcus
	FJ9D	Lactobacillus,Unclassified_f_Lactobacillaceae,Pediococcus,Unclassified_d_Bacteria,Weissella,Exiguobacterium,Limosilactobacillus,Klebsiella,Unclassified_o_Lactobacillales,Enterobacter,Leuconostoc,Enterococcus,Lactococcus,Unclassified_f_Enterobacteriaceae

## Sheet: Table S2
Table S2. Enzymes and microorganisms related to the metabolism of key flavor compounds in Rice-flavor Baijiu.
Substrates/Metabolites	Enzyme	EC number	Microorganisms
Acetic acid	Lactate 2-monooxygenase	1.13.12.4	Latilactobacillus,Weissella
	Acetaldehyde dehydrogenase (acetylating)	1.2.1.10	Unclassified_d_Bacteria,Unclassified_f_Enterobacteriaceae,Klebsiella,Streptococcus,Pseudomonas
	Aldehyde dehydrogenase (NAD+)	1.2.1.3	Saccharomyces,Enterobacter,Unclassified_c_Gammaproteobacteria,Klebsiella,Acetobacter
	Aldehyde dehydrogenase (NAD(P)+)	1.2.1.5	Klebsiella,Saccharomyces,Pseudomonas
	Pyruvate oxidase	1.2.3.3	Unclassified_f_Lactobacillaceae,Unclassified_o_Lactobacillales,Weissella,Pediococcus,Enterococcus,Lactobacillus,Lactococcus,Leuconostoc,Latilactobacillus
	Phosphate acetyltransferase	2.3.1.8	Weissella,Unclassified_f_Enterobacteriaceae,Pediococcus,Unclassified_d_Bacteria,Enterococcus,Unclassified_f_Moraxellaceae, Acinetobacter,Klebsiella,Tolumonas,Unclassified_c_Gammaproteobacteria
	Acetate kinase	2.7.2.1	Pediococcus,Lactobacillus,Weissella,Limosilactobacillus,Enterobacter,Enterococcus,Leuconostoc,Lactococcus,Unclassified_d_Bacteria,Moraxella
	Acetyl-coa hydrolase	3.1.2.1	Cyberlindnera,Saccharomyces,Pseudomonas
	Acylphosphatase	3.6.1.7	Pediococcus,Klebsiella,Unclassified_f_Enterobacteriaceae,Unclassified_o_Sphingomonadales,Lactococcus,Acetobacter,Enterobacter,Enterococcus,Leuconostoc,Unclassified_o_Enterobacterales
	Acetyl-coa synthetase	6.2.1.1	Unclassified_f_Enterobacteriaceae,Unclassified_o_Saccharomycetales,Ascoidea,Unclassified_f_Debaryomycetaceae,Unclassified_o_Mucorales,Gluconobacter,Cyberlindnera,Unclassified_f_Acetobacteraceae,Unclassified_p_Ascomycota,Unclassified_d_Bacteria
Fatty acids	Alcohol dehydrogenases	1.1.1.1	Pediococcus,Weissella,Limosilactobacillus,Klebsiella,Unclassified_d_Bacteria,Enterococcus,Saccharomyces,Unclassified_f_Enterobacteriaceae,Streptococcus,Leuconostoc
	3-oxoacyl-[acyl-carrier-protein] reductase	1.1.1.100	Pediococcus,Klebsiella,Weissella,Limosilactobacillus,Moraxella,Unclassified_f_Phaffomycetaceae,Lactococcus,Enterobacter,Cyberlindnera,Streptococcus
	3-hydroxyacyl-coa dehydrogenase	1.1.1.35	Unclassified_c_Gammaproteobacteria,Unclassified_f_Enterobacteriaceae,Klebsiella,Unclassified_d_Bacteria,Exiguobacterium,Moraxella,Acinetobacter,Unclassified_p_Proteobacteria,Enhydrobacter,Unclassified_o_Enterobacterales
	Aldehyde dehydrogenase (NAD+)	1.2.1.3	Saccharomyces,Enterobacter,Unclassified_c_Gammaproteobacteria,Klebsiella,Acetobacter
	Pyruvate dehydrogenase (acetyl-transferring)	1.2.4.1	Weissella,Unclassified_f_Enterobacteriaceae,Enterococcus,Limosilactobacillus,Cyberlindnera,Leuconostoc,Acetobacter,Gluconobacter,Pediococcus,Unclassified_d_Bacteria
	Enoyl-[acyl-carrier protein] reductase I	1.3.1.9	Pediococcus,Limosilactobacillus,Klebsiella,Weissella,Exiguobacterium,Unclassified_p_Ascomycota,Lactococcus,Enterococcus,Gluconobacter,Lactobacillus
	Dihydrolipoamide dehydrogenase	1.8.1.4	Pediococcus,Weissella,Klebsiella,Enterococcus,Limosilactobacillus,Exiguobacterium,Leuconostoc,Unclassified_o_Saccharomycetales,Streptococcus,Lactococcus
	Dihydrolipoyllysine-residue acetyltransferase	2.3.1.12	Klebsiella,Pseudomonas,Enterobacter,Acetobacter,Cyberlindnera,Gluconobacter,Moraxella,Unclassified_f_Moraxellaceae,Unclassified_d_Bacteria,Pachysolen
	Beta-ketoacyl-[acyl-carrier-protein] synthase II	2.3.1.179	Pediococcus,Enterobacter,Klebsiella,Enterococcus,Unclassified_d_Bacteria,Lactococcus,Exiguobacterium,Streptococcus,Acetobacter,Lactobacillus
	Beta-ketoacyl-[acyl-carrier-protein] synthase III	2.3.1.180	Weissella,Pediococcus,Limosilactobacillus,Leuconostoc,Klebsiella,Lactococcus,Lactobacillus,Streptococcus,Exiguobacterium,Enterococcus
	[Acyl-carrier-protein] S-malonyltransferase	2.3.1.39	Pediococcus,Klebsiella,Lactococcus,Unclassified_p_Ascomycota,Exiguobacterium,Unclassified_f_Moraxellaceae,Enterococcus,Streptococcus,Gluconobacter,Leuconostoc
	Beta-ketoacyl-[acyl-carrier-protein] synthase I	2.3.1.41	Klebsiella,Unclassified_f_Phaffomycetaceae,Enterobacter,Aphanomyces,Cyberlindnera,Unclassified_f_Enterobacteriaceae
	Fatty-acyl-CoA synthase	2.3.1.86	Unclassified_p_Ascomycota,Unclassified_f_Phaffomycetaceae,Cyberlindnera,Aphanomyces,Pseudomonas
	Enoyl-[acyl-carrier-protein] reductase (NADH)	2.3.1.9	Klebsiella,Enterobacter,Latilactobacillus,Pseudomonas,Lactococcus,Exiguobacterium,Acinetobacter,Erythrobacter,Unclassified_c_Gammaproteobacteria,Unclassified_d_Bacteria
	Triacylglycerol lipase	3.1.1.3	Unclassified_f_Moraxellaceae,Saccharomyces,Enterobacter,Unclassified_o_Saccharomycetales,Enterococcus,Klebsiella
	Enoyl-coa hydratase	4.2.1.17	Klebsiella,Unclassified_c_Gammaproteobacteria,Unclassified_d_Bacteria,Unclassified_f_Enterobacteriaceae,Enterobacter,Moraxella,Acinetobacter,Unclassified_p_Proteobacteria,Unclassified_o_Enterobacterales,Unclassified_f_Moraxellaceae
	3-hydroxyacyl-[acyl-carrier-protein] dehydratase	4.2.1.59	Limosilactobacillus,Weissella,Pediococcus,Unclassified_f_Enterobacteriaceae,Unclassified_p_Ascomycota,Enterobacter,Enterococcus,Leuconostoc,Lactococcus,Unclassified_d_Bacteria
	Long-chain-fatty-acid--CoA ligase	6.2.1.3	Unclassified_o_Saccharomycetales,Saccharomyces,Unclassified_d_Bacteria,Exiguobacterium,Lactococcus,Weissella,Unclassified_c_Gammaproteobacteria,Acinetobacter,Cronobacter,Pseudomonas
	Acetyl-coa carboxylase	6.4.1.2	Weissella,Limosilactobacillus,Lactococcus,Enterococcus,Leuconostoc,Pediococcus,Lactobacillus,Streptococcus,Exiguobacterium,Gluconobacter
	Acetyl-CoA C-acyltransferase	2.3.1.16	Klebsiella,Enterobacter,Exiguobacterium,Unclassified_d_Bacteria,Moraxella
2,3-Butanediol	Diacetyl reductase [(R)-acetoin forming]	1.1.1.303	Weissella,Saccharomyces,Streptococcus,Acetobacter
	Diacetyl reductase [(S)-acetoin forming]	1.1.1.304	Limosilactobacillus,Unclassified_f_Enterobacteriaceae,Klebsiella,Streptococcus,Weissella,Acinetobacter
	(R,R)-butanediol dehydrogenase	1.1.1.4	Weissella,Enterococcus,Saccharomyces,Lactococcus,Streptococcus,Pseudomonas
	(S,S)-butanediol dehydrogenase	1.1.1.76	Limosilactobacillus,Acetobacter
	Acetolactate synthase	2.2.1.6	Pediococcus,Unclassified_f_Enterobacteriaceae,Unclassified_f_Lactobacillaceae,Unclassified_d_Bacteria,Unclassified_o_Lactobacillales,Klebsiella,Lactococcus,Exiguobacterium,Unclassified_o_Saccharomycetales,Enterococcus
	Acetolactate decarboxylase	4.1.1.5	Unclassified_f_Lactobacillaceae,Pediococcus,Weissella,Enterococcus,Limosilactobacillus,Lactococcus,Exiguobacterium,Streptococcus,Leuconostoc,Acetobacter
Esters	Alcohol dehydrogenases	1.1.1.1	Pediococcus,Weissella,Limosilactobacillus,Klebsiella,Unclassified_d_Bacteria,Enterococcus,Saccharomyces,Unclassified_f_Enterobacteriaceae,Streptococcus,Leuconostoc
	Alcohol O-acetyltransferase	2.3.1.84	Unclassified_f_Enterobacteriaceae,Exiguobacterium,Klebsiella,Pseudomonas,Unclassified_p_Proteobacteria,Gluconobacter,Acetobacter,Enterobacter
	Carboxylesterase	3.1.1.1	Unclassified_o_Lactobacillales,Enterococcus,Leuconostoc,Pseudomonas,Weissella
	Triacylglycerol lipase	3.1.1.3	Unclassified_f_Moraxellaceae,Saccharomyces,Enterobacter,Unclassified_o_Saccharomycetales,Enterococcus,Klebsiella
Ethanol	Alcohol dehydrogenases	1.1.1.1	Pediococcus,Weissella,Limosilactobacillus,Klebsiella,Unclassified_d_Bacteria,Enterococcus,Saccharomyces,Unclassified_f_Enterobacteriaceae,Streptococcus,Leuconostoc
	Alcohol dehydrogenase (NADP+)	1.1.1.2	Pseudomonas,Unclassified_p_Proteobacteria,Saccharomyces
Higher alcohols	Alcohol dehydrogenases	1.1.1.1	Pediococcus,Weissella,Limosilactobacillus,Klebsiella,Unclassified_d_Bacteria,Enterococcus,Saccharomyces,Unclassified_f_Enterobacteriaceae,Streptococcus,Leuconostoc
	Alcohol dehydrogenase (NADP+)	1.1.1.2	Pseudomonas,Unclassified_p_Proteobacteria,Saccharomyces
	Homoserine dehydrogenase	1.1.1.3	Weissella,Unclassified_f_Enterobacteriaceae,Limosilactobacillus,Unclassified_c_Gammaproteobacteria,Lactococcus,Enterococcus,Acetobacter,Unclassified_o_Enterobacterales,Unclassified_o_Saccharomycetales,Unclassified_f_Moraxellaceae
	3-isopropylmalate dehydrogenase	1.1.1.85	Saccharomyces,Lactococcus,Klebsiella,Rhizopus,Saccharomycopsis,Enterobacter,Gluconobacter,Leuconostoc,Unclassified_p_Proteobacteria,Enterococcus
	Ketol-acid reductoisomerase	1.1.1.86	Enterobacter,Gluconobacter,Lactococcus,Streptococcus,Enterococcus,Moraxella,Acetobacter,Unclassified_o_Saccharomycetales
	Aryl-alcohol dehydrogenase	1.1.1.90	Pediococcus,Klebsiella,Weissella,Latilactobacillus
	Catalase peroxidase	1.11.1.21	Unclassified_f_Enterobacteriaceae,Unclassified_d_Bacteria,Pseudomonas,Acinetobacter
	Aspartate-semialdehyde dehydrogenase	1.2.1.11	Pediococcus,Weissella,Limosilactobacillus,Lactococcus,Enterococcus,Enterobacter,Klebsiella,Unclassified_d_Bacteria,Leuconostoc,Streptococcus
	Aldehyde dehydrogenase (NAD(P)+)	1.2.1.5	Klebsiella,Saccharomyces,Pseudomonas
	Homocysteine S-methyltransferase	2.1.1.10	Saccharomyces,Klebsiella,Streptococcus,Weissella
	Methionine synthase	2.1.1.13	Unclassified_d_Bacteria,Unclassified_f_Enterobacteriaceae,Unclassified_p_Proteobacteria,Moraxella,Unclassified_f_Moraxellaceae,Enterobacter,Acinetobacter,Unclassified_o_Rhodospirillales,Rhizopus,Klebsiella
	S-methyltransferase	2.1.1.14	Weissella,Unclassified_d_Bacteria,Enterococcus,Lactococcus,Limosilactobacillus,Gluconobacter,Klebsiella,Streptococcus,Acetobacter,Leuconostoc
	Glycine hydroxymethyltransferase	2.1.2.1	Weissella,Klebsiella,Exiguobacterium,Limosilactobacillus,Enterococcus,Rhizopus,Lactobacillus,Lactococcus,Gluconobacter,Unclassified_c_Gammaproteobacteria
	Acetolactate synthase I/II/III large subunit	2.2.1.6	Pediococcus,Unclassified_f_Enterobacteriaceae,Unclassified_f_Lactobacillaceae,Unclassified_d_Bacteria,Unclassified_o_Lactobacillales,Klebsiella,Lactococcus,Exiguobacterium,Unclassified_o_Saccharomycetales,Enterococcus
	Serine O-acetyltransferase	2.3.1.30	Limosilactobacillus,Astraeus,Enterococcus,Gluconobacter,Lactococcus,Acetobacter,Streptococcus,Pseudomonas,Lactobacillus
	2-isopropylmalate synthase	2.3.3.13	Unclassified_f_Enterobacteriaceae,Gluconobacter,Acetobacter,Klebsiella,Streptococcus,Lactococcus,Leuconostoc,Pediococcus,Enterococcus,Phytobacter
	Cysteine synthase	2.5.1.47	Klebsiella,Lactococcus,Limosilactobacillus,Gluconobacter,Enterococcus,Acetobacter,Enterobacter,Moraxella,Streptococcus,Acinetobacter
	Aspartate transaminase	2.6.1.1	Klebsiella,Unclassified_o_Saccharomycetales,Cyberlindnera,Enterococcus,Enterobacter,Lactococcus,Unclassified_d_Bacteria,Streptococcus,Pseudomonas,Levilactobacillus
	D-alanine transaminase	2.6.1.21	Weissella,Grimontella,Enterococcus,Unclassified_o_Enterobacterales
	Branched-chain amino acid aminotransferase	2.6.1.42	Weissella,Enterococcus,Limosilactobacillus,Enterobacter,Leuconostoc,Unclassified_d_Bacteria,Lactococcus,Saccharomyces,Acetobacter,Streptococcus
	Aromatic-amino-acid transaminase	2.6.1.57	Unclassified_p_Ascomycota,Klebsiella
	Histidinol-phosphate aminotransferase	2.6.1.9	Limosilactobacillus,Klebsiella,Gluconobacter,Leuconostoc,Unclassified_d_Bacteria,Lactococcus,Acetobacter,Unclassified_f_Enterobacteriaceae,Streptococcus,Acinetobacter
	Homoserine kinase	2.7.1.39	Enterococcus,Leuconostoc,Limosilactobacillus,Lactococcus,Unclassified_d_Bacteria,Acetobacter,Gluconobacter,Liquorilactobacillus,Streptococcus,Weissella
	Aspartate kinase	2.7.2.4	Weissella,Unclassified_f_Enterobacteriaceae,Unclassified_c_Gammaproteobacteria,Limosilactobacillus,Lactococcus,Leuconostoc,Enterococcus,Enterobacter,Unclassified_o_Saccharomycetales,Exiguobacterium
	Amidase	3.5.1.4	Klebsiella,Lactococcus,Leuconostoc,Unclassified_d_Bacteria,Pseudomonas,Saccharomyces,Pediococcus
	Pyruvate decarboxylase	4.1.1.1	Gluconobacter,Acetobacter
	3-isopropylmalate dehydratase	4.2.1.33	Lactococcus,Enterococcus,Gluconobacter,Klebsiella,Acetobacter,Leuconostoc,Moraxella,Streptococcus,Pseudomonas,Unclassified_p_Proteobacteria
	Dihydroxy-acid dehydratase	4.2.1.9	Unclassified_d_Bacteria,Unclassified_f_Acetobacteraceae,Lactococcus,Unclassified_c_Gammaproteobacteria,Acetobacter,Unclassified_f_Enterobacteriaceae,Streptococcus,Unclassified_f_Enterococcaceae,Unclassified_p_Proteobacteria,Moraxella
	Threonine synthase	4.2.3.1	Klebsiella,Gluconobacter,Enterobacter,Streptococcus,Unclassified_p_Proteobacteria,Acetobacter,Enterococcus,Lactobacillus,Weissella,Unclassified_c_Gammaproteobacteria
	Threonine dehydratase	4.3.1.19	Pediococcus,Unclassified_d_Bacteria,Enterococcus,Klebsiella,Unclassified_o_Saccharomycetales,Lactococcus,Unclassified_f_Enterobacteriaceae,Moraxella,Acetobacter,Cyberlindnera
	Cystathionine gamma-lyase	4.4.1.1	Weissella,Saccharomyces,Enterococcus,Leuconostoc,Lactobacillus,Pediococcus
	Cystathionine beta-lyase	4.4.1.8	Limosilactobacillus,Weissella,Klebsiella,Lactococcus,Enterococcus,Unclassified_f_Enterobacteriaceae,Enterobacter,Unclassified_c_Gammaproteobacteria
phenylethylalcohol	aromatic-amino-acid transaminase	2.6.1.57	Unclassified_p_Ascomycota,Klebsiella
	phenylpyruvate decarboxylase	4.1.1.43	Saccharomyces,Unclassified_f_Saccharomycetaceae
	aryl-alcohol dehydrogenase	1.1.1.90	Pediococcus,Klebsiella,Weissella,Latilactobacillus
Succinic acid	Malate dehydrogenase	1.1.1.37	Pediococcus,Weissella,Rhizopus,Enterobacter,Moraxella,Unclassified_f_Phaffomycetaceae,Cyberlindnera,Acinetobacter,Pseudomonas,Unclassified_o_Saccharomycetales
	Isocitrate dehydrogenase (NADP+)	1.1.1.42	Unclassified_o_Saccharomycetales,Enterobacter,Limosilactobacillus,Enterococcus,Unclassified_d_Bacteria,Exiguobacterium,Unclassified_c_Gammaproteobacteria,Cyberlindnera,Streptococcus,Saccharomyces
	Malate dehydrogenase (quinone)	1.1.5.4	Unclassified_f_Enterobacteriaceae,Exiguobacterium,Klebsiella,Pseudomonas,Unclassified_p_Proteobacteria,Gluconobacter,Acetobacter,Enterobacter
	Oxoglutarate dehydrogenase (succinyl-transferring)	1.2.4.2	Unclassified_d_Bacteria,Gluconobacter,Unclassified_f_Moraxellaceae,Exiguobacterium,Unclassified_o_Rhodospirillales,Enhydrobacter,Unclassified_p_Proteobacteria,
	Succinate dehydrogenase	1.3.5.1	Enterobacter,Cyberlindnera,Unclassified_d_Bacteria,Unclassified_f_Saccharomycetaceae,Unclassified_p_Proteobacteria,Unclassified_f_Enterobacteriaceae,Moraxella,Unclassified_o_Rhodospirillales,Acinetobacter,Rhizopus,Unclassified_f_Moraxellaceae,Unclassified_c_Gammaproteobacteria
	Succinate dehydrogenase	1.3.5.4	Pediococcus,Unclassified_f_Enterobacteriaceae
	Dihydrolipoyl dehydrogenase	1.8.1.4	Pediococcus,Weissella,Klebsiella,Enterococcus,Limosilactobacillus,Exiguobacterium,Leuconostoc,Unclassified_o_Saccharomycetales,Streptococcus,Lactococcus,Gluconobacter,Moraxella,Unclassified_c_Gammaproteobacteria,Acinetobacter,Acetobacter,Cyberlindnera
	Dihydrolipoyllysine-residue succinyltransferase	2.3.1.61	Exiguobacterium,Unclassified_f_Moraxellaceae,Enterobacter,Acetobacter,Unclassified_o_Saccharomycetales,Unclassified_f_Enterobacteriaceae,Unclassified_d_Bacteria
	Citrate synthase	2.3.3.1	Unclassified_f_Enterobacteriaceae,Klebsiella,Unclassified_d_Bacteria
	Fumarate hydratase	4.2.1.2	Pediococcus,Klebsiella,Moraxella,Unclassified_f_Enterobacteriaceae,Limosilactobacillus,Acetobacter,Unclassified_d_Bacteria,Lactobacillus,Enterobacter,Exiguobacterium,Weissella,Saccharomyces
	Aconitate hydratase	4.2.1.3	Unclassified_p_Ascomycota,Unclassified_d_Bacteria,Unclassified_f_Enterobacteriaceae,Unclassified_p_Proteobacteria,Klebsiella,Streptococcus,Unclassified_c_Bacilli,Enterococcus,Exiguobacterium,Lactococcus
	Succinate-CoA ligase (ADP-forming)	6.2.1.5	Exiguobacterium,Saccharomyces,Unclassified_f_Enterobacteriaceae,Enterobacter,Cyberlindnera,Pachysolen,Moraxella,Unclassified_p_Proteobacteria,Cloacibacterium,Erythrobacter
